# Supplementary material
Source: PubMed Central journal article supplement (PMC2888094)
Supplement: supp_90_10_2342__1.pdf [file supp_90_10_2342__1.pdf]

**Supplementary Table S1.** AL3 primers used in this study

| Primer | Sequence (5'-3')     | Nucleotide position relative to start site of LAT |
|--------|----------------------|---------------------------------------------------|
| C      | ATGCTCGGTGGTATGAAGGA | +1277 to +1257                                    |
| K      | AAGCGAGGATATGGAGGAGT | +1079 to +1098                                    |
| L      | GACCGGGGTGATCTCTGG   | +1114 to +1130                                    |
| M      | CGGCGGTCTCTAAGAAGCA  | +1229 to +1247                                    |
| E-for  | GCCACTCCTCCATATCCTCG | +1101 to +1082                                    |
| 1-for  | AGTAAGACCCAAGCATA    | +996 to +980                                      |
| 2-for  | GTGGTCGGACGGGTAAGTAA | +821 to +840                                      |
| 3-for  | GTGTCTAACCTACCTGGAA  | +658 to +676                                      |
